# Supplementary material for: Cost-effectiveness in diagnosis of stable angina patients: a decision-analytical modelling approach
Source: HighWire-hosted journal article supplement (doi:10.1136/openhrt-2021-001700), 2022-04-01
Supplement: openhrt-2021-001700supp001_data_supplement.pdf [file openhrt-2021-001700supp001_data_supplement.pdf]

### **Supplementary data**

**Table A1** details all of the possible strategies that were considered, the ICERs and which ones were dominated or extendedly dominated.

**Table A2** details the parameters that were used to derive the cost effectiveness model.

**Table A3** details the results for all strategies, the ICER and whether the strategy was dominated or extendedly dominated.

**Table A4** presents the breakdown of the scenario analysis according to the pretest probability of CAD.

**Figure A4** details the scenario analyses of pre-test likelihood and cost effectiveness threshold per correct diagnosis.

**Tables**

| Strategy                                                                           | First test | Second test | Third test |
|------------------------------------------------------------------------------------|------------|-------------|------------|
| 0                                                                                  | No testing |             |            |
| 1                                                                                  | ICA-FFR    |             |            |
| <b>Standalone testing which triggers ICA-FFR with a positive test result</b>       |            |             |            |
| 2                                                                                  | CTCA       | ICA-FFR     |            |
| 3                                                                                  | CMR        | ICA-FFR     |            |
| 4                                                                                  | PET        | ICA-FFR     |            |
| 5                                                                                  | SE         | ICA-FFR     |            |
| 6                                                                                  | ICA        | ICA-FFR     |            |
| 7                                                                                  | SPECT      | ICA-FFR     |            |
| <b>Anatomical imaging first with CT followed by functional imaging and ICA-FFR</b> |            |             |            |
| 8                                                                                  | CTCA       | CMR         | ICA-FFR    |
| 9                                                                                  | CTCA       | SE          | ICA-FFR    |
| 10                                                                                 | CTCA       | SPECT       | ICA-FFR    |
| 11                                                                                 | CTCA       | PET         | ICA-FFR    |
| 12                                                                                 | CTCA       | CT-FFR      | ICA-FFR    |
| 13*                                                                                | CTCA       | ICA         | ICA-FFR    |
| <b>Functional imaging first followed by anatomical CT and then ICA-FFR</b>         |            |             |            |
| 14                                                                                 | SE         | CTCA        | ICA-FFR    |
| 15                                                                                 | SPECT      | CTCA        | ICA-FFR    |
| 16                                                                                 | CMR        | CTCA        | ICA-FFR    |
| 17                                                                                 | PET        | CTCA        | ICA-FFR    |

**Table A1.** 17 diagnostic strategies used in the model. CTCA: Computed Tomography Coronary Angiography. CT-FFR: Computed Tomography derived Fractional Flow Reserve. CMR: Cardiovascular Magnetic Resonance. ICA: Invasive Coronary Angiography. ICA-FFR: Invasive Coronary Angiography and Fractional Flow Reserve. Positron Emission Tomography. SE: Stress Echocardiography. SPECT: Single-Photon Emission Computed Tomography.

| Test   | Parameter                      | Mean (SE)         | Distribution | Source                                                                       |
|--------|--------------------------------|-------------------|--------------|------------------------------------------------------------------------------|
|        | Cost (£)                       | 2,153 (430.60)    | Gamma        | 2017/2018 NHS Reference Costs                                                |
|        | Complication cost (£)          | 1,435.30 (353.82) | Gamma        | Weighted average of 2017/2018 NHS Reference cost of the following HRG codes: |
| ICA-   |                                |                   |              | EB07, EB03, EB10, EB14, AA29, AA22, YQ50 and WH05Z                           |
| FFR    | Sensitivity                    | 100%              | -            | Assumption                                                                   |
|        | Specificity                    | 100%              | -            | Assumption                                                                   |
|        | Risk of death                  | 0.072% (0.0001)   | Beta         | Noto et al (1991)                                                            |
|        | Risk of non-fatal complication | 0.94% (0.002)     | Beta         |                                                                              |
|        | Cost (£)                       | 262 (52.40)       | Gamma        | 2017/2018 NHS Reference Costs                                                |
|        | Complication cost (£)          | 563.04 (112.61)   | Gamma        | Weighted average of 2017/2018 NHS Reference cost of the following HRG codes: |
| CTCA   |                                |                   |              | WH05 and EB03                                                                |
|        | Sensitivity                    | 93% (0.016)       | Beta         | Knuuti et al (2018)                                                          |
|        | Specificity                    | 53% (0.127)       | Beta         |                                                                              |
|        | Risk of death                  | 0%                | -            | Lu et al (2017)                                                              |
|        | Risk of non-fatal complication | 0.80% (0.0013)    | Beta         |                                                                              |
| CT-FFR | Cost (£)                       | 962 (192.40)      | Gamma        | 2017/2018 NHS Reference Costs                                                |

| Test | Parameter                      | Mean (SE)        | Distribution | Source                                                            |
|------|--------------------------------|------------------|--------------|-------------------------------------------------------------------|
|      | Sensitivity                    | 90% (0.016)      | Beta         | Danad et al (2017)                                                |
|      | Specificity                    | 71% (0.0280)     | Beta         | Danad et al (2017)                                                |
|      | Risk of death                  | 0%               | -            | Assumed to be 0 to avoid double counting                          |
|      | Risk of non-fatal complication | 0%               | -            | Assumed to be 0 to avoid double counting                          |
|      | Cost (£)                       | 389 (77.80)      | Gamma        | 2017/2018 NHS Reference Costs                                     |
|      |                                |                  |              | Weighted average of 2017/2018 NHS Reference cost of the following |
|      | Complication cost (£)          | 1,253 (250.60)   | Gamma        | HRG codes:<br>EB07, EB03, EB10, WH05Z                             |
| CMR  | Sensitivity                    | 89% (0.017)      | Beta         | Knuuti et al (2018)                                               |
|      | Specificity                    | 87% (0.023)      | Beta         | Knuuti et al (2018)                                               |
|      | Risk of death                  | 0%               | -            | Bruder et al (2013)                                               |
|      | Risk of non-fatal complication | 0.10% (0.0003)   | Beta         | Bruder et al (2013)                                               |
|      | Cost (£)                       | 498 (99.60)      | Gamma        | 2017/2018 NHS Reference Costs                                     |
|      | Complication cost (£)          | 1962.83 (392.57) | Gamma        | Assumed to be equal to SPECT                                      |
| PET  | Sensitivity                    | 89% (0.0224)     | Beta         | Knuuti et al (2018)                                               |
|      | Specificity                    | 85% (0.0177)     | Beta         | Knuuti et al (2018)                                               |
|      | Risk of death                  | 0%               | -            | Assumed to be equal to SPECT                                      |

| Test | Parameter                      | Mean (SE)          | Distribution | Source                                                            |
|------|--------------------------------|--------------------|--------------|-------------------------------------------------------------------|
|      | Risk of non-fatal complication | 0.10% (0.0003)     | Beta         | Assumed to be equal to SPECT                                      |
|      | Cost (£)                       | 250 (50)           | Gamma        | 2017/2018 NHS Reference Costs                                     |
|      |                                |                    |              | Weighted average of 2017/2018 NHS Reference cost of the following |
|      | Complication cost (£)          | 1,192.06 (238.41)  | Gamma        | HRG codes:<br>EB07, EB03, EB10, EB14, AA35 and AA22               |
| SE   | Sensitivity                    | 77% (0.05)         | Beta         | Danad et al (2017)                                                |
|      | Specificity                    | 75% (0.087)        | Beta         | Danad et al (2017)                                                |
|      | Risk of death                  | 0.00069% (0.00002) | Beta         | Varga et al (2006)                                                |
|      | Risk of non-fatal complication | 0.10% (0.0001)     | Beta         | Varga et al (2006)                                                |
|      | Cost (£)                       | 1,726 (345.20)     | Gamma        | 2017/2018 NHS Reference Costs                                     |
|      |                                |                    |              | Weighted average of 2017/2018 NHS Reference cost of the following |
|      | Complication cost (£)          | 1349.81 (269.96)   | Gamma        | HRG codes:<br>EB07, EB03, EB10, EB14, AA29, AA22, YQ50 and WH05Z  |
| ICA  | Sensitivity                    | 68% (0.05)         | Beta         | Knuuti et al (2018)                                               |
|      | Specificity                    | 73% (0.836)        | Beta         | Knuuti et al (2018)                                               |
|      | Risk of death                  | 0.072% (0.0001)    | Beta         | Noto et al (1991)                                                 |
|      | Risk of non-fatal complication | 0.74% (0.0015)     | Beta         | Noto et al (1991)                                                 |

| Test  | Parameter                      | Mean (SE)         | Distribution | Source                                                                                            |
|-------|--------------------------------|-------------------|--------------|---------------------------------------------------------------------------------------------------|
|       | Cost (£)                       | 272 (54.4)        | Gamma        | 2017/2018 NHS Reference Costs                                                                     |
|       | Complication cost (£)          | 1,962.83 (490.71) | Gamma        | Weighted average of 2017/2018 NHS Reference cost of the following HRG codes: EB10, DZ19, and DZ20 |
| SPECT | Sensitivity                    | 73% (0.0593)      | Beta         | Knuuti et al (2018)                                                                               |
|       | Specificity                    | 83% (0.0413)      | Beta         | Knuuti et al (2018)                                                                               |
|       | Risk of death                  | 0%                | -            | Cerqueira et al (1994)                                                                            |
|       | Risk of non-fatal complication | 0.10% (0.0003)    | Beta         | Cerqueira et al (1994)                                                                            |

**Table A2.** Model parameters. CTCA: Computed Tomography Coronary Angiography. CT-FFR: Computed Tomography derived Fractional Flow Reserve. CMR: Cardiovascular Magnetic Resonance. ICA: Invasive Coronary Angiography. ICA-FFR: Invasive Coronary Angiography and Fractional Flow Reserve. PET: Positron Emission Tomography. SE: Stress Echocardiography. SPECT: Single-Photon Emission Computed Tomography. NHS: National Health Service

**Table A3. Outline all of the strategies that were evaluated. The options that were dominated or extendedly dominated are identified.**

| Strategy no. | Description            | Expected deaths | Expected complications | Expected proportion of incorrect diagnoses | Expected proportion of correct diagnoses | Expected cost | Dominance            |
|--------------|------------------------|-----------------|------------------------|--------------------------------------------|------------------------------------------|---------------|----------------------|
| 1            | ICA-FFR                | 0.08%           | 0.94%                  | 0.00%                                      | 98.97%                                   | £2,176.02     | Non-dominated        |
| 2            | CTCA + ICA-FFR         | 0.05%           | 1.41%                  | 2.63%                                      | 95.91%                                   | £1,656.47     | Dominated            |
| 3            | CMR + ICA-FFR          | 0.03%           | 0.46%                  | 4.16%                                      | 95.35%                                   | £1,291.80     | Non-dominated        |
| 4            | PET + ICA-FFR          | 0.04%           | 0.50%                  | 4.11%                                      | 95.35%                                   | £1,431.49     | Dominated            |
| 5            | SE + ICA-FFR           | 0.04%           | 0.52%                  | 8.71%                                      | 90.73%                                   | £1,221.70     | Dominated            |
| 6            | ICA + FFR              | 0.12%           | 1.24%                  | 11.84%                                     | 86.80%                                   | £2,473.56     | Dominated            |
| 7            | SPECT +ICA-FFR         | 0.03%           | 0.46%                  | 10.16%                                     | 89.35%                                   | £1,103.96     | Dominated            |
| 8            | CTCA + CMR + ICA-FFR   | 0.02%           | 1.10%                  | 5.25%                                      | 93.59%                                   | £1,090.84     | Dominated            |
| 9            | CTCA + SE + ICA-FFR    | 0.02%           | 1.14%                  | 8.20%                                      | 90.64%                                   | £1,045.88     | Extendedly dominated |
| 10           | CTCA + SPECT + ICA-FFR | 0.02%           | 1.10%                  | 9.12%                                      | 89.76%                                   | £970.47       | Extendedly dominated |
| 11           | CTCA + PET + ICA-FFR   | 0.02%           | 1.12%                  | 5.26%                                      | 93.60%                                   | £1,180.00     | Dominated            |
| 12           | CTCA + FFRCT + ICA-FFR | 0.03%           | 1.09%                  | 4.32%                                      | 94.55%                                   | £2,202.17     | Dominated            |
| 13           | CTCA + ICA + FFR       | 0.08%           | 1.60%                  | 10.20%                                     | 88.13%                                   | £1,959.60     | Dominated            |
| 14           | SE + CTCA + ICA-FFR    | 0.02%           | 0.73%                  | 9.88%                                      | 89.37%                                   | £990.23       | Dominated            |
| 15           | SPECT + CTCA + ICA-FFR | 0.02%           | 0.63%                  | 11.16%                                     | 88.18%                                   | £905.90       | Non-dominated        |
| 16           | CMR + CTCA + ICA-FFR   | 0.02%           | 0.65%                  | 5.25%                                      | 94.08%                                   | £1,075.93     | Non-dominated        |
| 17           | PET + CTCA +ICA-FFR    | 0.02%           | 0.70%                  | 5.24%                                      | 94.04%                                   | £1,209.28     | Dominated            |

Table A4. Scenario analysis on pre-test probability

| Pre-test probability                             | Strategy no. | Description            | Expected costs | Expected proportion of correct diagnoses | Expected proportion of complications | Expected proportion of deaths | NMB       | Probability of being the most cost-effective strategy |
|--------------------------------------------------|--------------|------------------------|----------------|------------------------------------------|--------------------------------------|-------------------------------|-----------|-------------------------------------------------------|
| <b>CET value of £2,000 per correct diagnosis</b> |              |                        |                |                                          |                                      |                               |           |                                                       |
| 15%                                              | 15           | SPECT + CTCA + ICA-FFR | £633.04        | 95.22%                                   | 0.43%                                | 0.01%                         | £1,271.34 | 47%                                                   |
| 25.00%                                           | 15           | SPECT + CTCA + ICA-FFR | £742.42        | 92.25%                                   | 0.52%                                | 0.01%                         | £1,102.53 | 47%                                                   |
| 35.00%                                           | 15           | SPECT + CTCA + ICA-FFR | £863.64        | 88.96%                                   | 0.60%                                | 0.02%                         | £915.64   | 44%                                                   |
| 45.00%                                           | 15           | SPECT + CTCA + ICA-FFR | £995.88        | 85.77%                                   | 0.70%                                | 0.02%                         | £719.46   | 42%                                                   |
| 55.00%                                           | 15           | SPECT + CTCA + ICA-FFR | £1,142.66      | 82.70%                                   | 0.81%                                | 0.03%                         | £511.44   | 41%                                                   |
| 65.00%                                           | 15           | SPECT + CTCA + ICA-FFR | £1,293.45      | 78.97%                                   | 0.91%                                | 0.03%                         | £286.02   | 33%                                                   |
| 75.00%                                           | 15           | SPECT + CTCA + ICA-FFR | £1,469.07      | 75.79%                                   | 1.02%                                | 0.04%                         | £46.66    | 29%                                                   |
| 85.00%                                           | 7            | SPECT +ICA-FFR         | £1,666.85      | 76.22%                                   | 0.70%                                | 0.05%                         | -£142.47  | 26%                                                   |
| <b>CET value of £3,000 per correct diagnosis</b> |              |                        |                |                                          |                                      |                               |           |                                                       |
| 15%                                              | 15           | SPECT + CTCA + ICA-FFR | £637.88        | 95.25%                                   | 0.43%                                | 0.01%                         | £2,219.55 | 40%                                                   |
| 25.00%                                           | 15           | SPECT + CTCA + ICA-FFR | £746.65        | 92.19%                                   | 0.51%                                | 0.02%                         | £2,019.19 | 34%                                                   |
| 35.00%                                           | 15           | SPECT + CTCA + ICA-FFR | £868.55        | 89.17%                                   | 0.61%                                | 0.02%                         | £1,806.42 | 31%                                                   |
| 45.00%                                           | 16           | CMR + CTCA + ICA-FFR   | £1,193.56      | 92.76%                                   | 0.74%                                | 0.03%                         | £1,589.34 | 32%                                                   |
| 55.00%                                           | 16           | CMR + CTCA + ICA-FFR   | £1,378.19      | 90.93%                                   | 0.88%                                | 0.03%                         | £1,349.71 | 26%                                                   |
| 65.00%                                           | 16           | CMR + CTCA + ICA-FFR   | £1,573.38      | 88.98%                                   | 1.01%                                | 0.04%                         | £1,096.03 | 19%                                                   |
| 75.00%                                           | 3            | CMR + ICA-FFR          | £1,914.89      | 91.00%                                   | 0.73%                                | 0.06%                         | £815.22   | 12%                                                   |
| 85.00%                                           | 1            | ICA-FFR                | £2,166.69      | 98.97%                                   | 0.94%                                | 0.08%                         | £802.51   | 80%                                                   |

| Pre-test probability                              | Strategy no. | Description          | Expected costs | Expected proportion of correct diagnoses | Expected proportion of complications | Expected proportion of deaths | NMB       | Probability of being the most cost-effective strategy |
|---------------------------------------------------|--------------|----------------------|----------------|------------------------------------------|--------------------------------------|-------------------------------|-----------|-------------------------------------------------------|
| <b>CET value of £5,000 per correct diagnosis</b>  |              |                      |                |                                          |                                      |                               |           |                                                       |
| 15%                                               | 16           | CMR + CTCA + ICA-FFR | £745.54        | 97.70%                                   | 0.39%                                | 0.01%                         | £4,139.60 | 38%                                                   |
| 25.00%                                            | 16           | CMR + CTCA + ICA-FFR | £877.13        | 96.19%                                   | 0.50%                                | 0.02%                         | £3,932.29 | 47%                                                   |
| 35.00%                                            | 16           | CMR + CTCA + ICA-FFR | £1,023.78      | 94.59%                                   | 0.61%                                | 0.02%                         | £3,705.78 | 49%                                                   |
| 45.00%                                            | 16           | CMR + CTCA + ICA-FFR | £1,201.97      | 92.82%                                   | 0.75%                                | 0.03%                         | £3,438.85 | 47%                                                   |
| 55.00%                                            | 16           | CMR + CTCA + ICA-FFR | £1,384.03      | 90.97%                                   | 0.88%                                | 0.03%                         | £3,164.40 | 34%                                                   |
| 65.00%                                            | 3            | CMR + ICA-FFR        | £1,739.05      | 92.13%                                   | 0.65%                                | 0.05%                         | £2,867.28 | 24%                                                   |
| 75.00%                                            | 1            | ICA-FFR              | £2,178.37      | 98.97%                                   | 0.94%                                | 0.08%                         | £2,770.38 | 73%                                                   |
| 85.00%                                            | 1            | ICA-FFR              | £2,175.19      | 98.97%                                   | 0.94%                                | 0.08%                         | £2,773.40 | 99%                                                   |
| <b>CET value of £7,500 per correct diagnosis</b>  |              |                      |                |                                          |                                      |                               |           |                                                       |
| 15%                                               | 16           | CMR + CTCA + ICA-FFR | £738.62        | 97.70%                                   | 0.39%                                | 0.01%                         | £6,589.16 | 50%                                                   |
| 25.00%                                            | 16           | CMR + CTCA + ICA-FFR | £880.02        | 96.18%                                   | 0.50%                                | 0.02%                         | £6,333.37 | 57%                                                   |
| 35.00%                                            | 16           | CMR + CTCA + ICA-FFR | £1,039.49      | 94.59%                                   | 0.61%                                | 0.02%                         | £6,055.12 | 53%                                                   |
| 45.00%                                            | 16           | CMR + CTCA + ICA-FFR | £1,205.47      | 92.80%                                   | 0.75%                                | 0.03%                         | £5,754.55 | 44%                                                   |
| 55.00%                                            | 16           | CMR + CTCA + ICA-FFR | £1,388.79      | 90.98%                                   | 0.88%                                | 0.03%                         | £5,435.00 | 24%                                                   |
| 65.00%                                            | 1            | ICA-FFR              | £2,169.79      | 98.97%                                   | 0.94%                                | 0.08%                         | £5,253.31 | 57%                                                   |
| 75.00%                                            | 1            | ICA-FFR              | £2,180.12      | 98.97%                                   | 0.94%                                | 0.08%                         | £5,242.90 | 95%                                                   |
| 85.00%                                            | 1            | ICA-FFR              | £2,167.80      | 98.97%                                   | 0.94%                                | 0.08%                         | £5,255.18 | 100%                                                  |
| <b>CET value of £10,000 per correct diagnosis</b> |              |                      |                |                                          |                                      |                               |           |                                                       |
| 15%                                               | 16           | CMR + CTCA + ICA-FFR | £737.57        | 97.70%                                   | 0.39%                                | 0.01%                         | £9,032.81 | 60%                                                   |

| Pre-test probability                              | Strategy no. | Description          | Expected costs | Expected proportion of correct diagnoses | Expected proportion of complications | Expected proportion of deaths | NMB        | Probability of being the most cost-effective strategy |
|---------------------------------------------------|--------------|----------------------|----------------|------------------------------------------|--------------------------------------|-------------------------------|------------|-------------------------------------------------------|
| 25.00%                                            | 16           | CMR + CTCA + ICA-FFR | £876.13        | 96.17%                                   | 0.50%                                | 0.02%                         | £8,741.16  | 62%                                                   |
| 35.00%                                            | 16           | CMR + CTCA + ICA-FFR | £1,030.93      | 94.57%                                   | 0.62%                                | 0.02%                         | £8,425.97  | 52%                                                   |
| 45.00%                                            | 16           | CMR + CTCA + ICA-FFR | £1,201.95      | 92.78%                                   | 0.74%                                | 0.03%                         | £8,075.82  | 29%                                                   |
| 55.00%                                            | 3            | CMR + ICA-FFR        | £1,572.96      | 93.33%                                   | 0.58%                                | 0.05%                         | £7,759.85  | 24%                                                   |
| 65.00%                                            | 1            | ICA-FFR              | £2,159.87      | 98.97%                                   | 0.94%                                | 0.08%                         | £7,737.33  | 84%                                                   |
| 75.00%                                            | 1            | ICA-FFR              | £2,156.34      | 98.97%                                   | 0.94%                                | 0.08%                         | £7,741.02  | 100%                                                  |
| 85.00%                                            | 1            | ICA-FFR              | £2,168.35      | 98.97%                                   | 0.94%                                | 0.08%                         | £7,729.09  | 100%                                                  |
| <b>CET value of £15,000 per correct diagnosis</b> |              |                      |                |                                          |                                      |                               |            |                                                       |
| 15%                                               | 16           | CMR + CTCA + ICA-FFR | £735.71        | 97.69%                                   | 0.39%                                | 0.01%                         | £13,918.48 | 67%                                                   |
| 25.00%                                            | 16           | CMR + CTCA + ICA-FFR | £888.94        | 96.18%                                   | 0.50%                                | 0.02%                         | £13,538.14 | 56%                                                   |
| 35.00%                                            | 16           | CMR + CTCA + ICA-FFR | £1,028.96      | 94.55%                                   | 0.62%                                | 0.02%                         | £13,153.49 | 38%                                                   |
| 45.00%                                            | 3            | CMR + ICA-FFR        | £1,410.39      | 94.48%                                   | 0.51%                                | 0.04%                         | £12,762.16 | 27%                                                   |
| 55.00%                                            | 1            | ICA-FFR              | £2,158.18      | 98.97%                                   | 0.94%                                | 0.08%                         | £12,687.71 | 79%                                                   |
| 65.00%                                            | 1            | ICA-FFR              | £2,162.09      | 98.97%                                   | 0.94%                                | 0.08%                         | £12,683.86 | 98%                                                   |
| 75.00%                                            | 1            | ICA-FFR              | £2,164.70      | 98.97%                                   | 0.94%                                | 0.08%                         | £12,681.19 | 100%                                                  |
| 85.00%                                            | 1            | ICA-FFR              | £2,170.22      | 98.97%                                   | 0.94%                                | 0.08%                         | £12,675.73 | 100%                                                  |
| <b>CET value of £20,000 per correct diagnosis</b> |              |                      |                |                                          |                                      |                               |            |                                                       |
| 15%                                               | 16           | CMR + CTCA + ICA-FFR | £737.60        | 97.69%                                   | 0.38%                                | 0.01%                         | £18,801.05 | 66%                                                   |
| 25.00%                                            | 16           | CMR + CTCA + ICA-FFR | £881.40        | 96.20%                                   | 0.50%                                | 0.02%                         | £18,359.30 | 50%                                                   |
| 35.00%                                            | 3            | CMR + ICA-FFR        | £1,248.38      | 95.66%                                   | 0.44%                                | 0.03%                         | £17,884.35 | 31%                                                   |
| 45.00%                                            | 1            | ICA-FFR              | £2,158.89      | 98.97%                                   | 0.94%                                | 0.08%                         | £17,635.79 | 60%                                                   |

| Pre-test probability                              | Strategy no. | Description          | Expected costs | Expected proportion of correct diagnoses | Expected proportion of complications | Expected proportion of deaths | NMB        | Probability of being the most cost-effective strategy |
|---------------------------------------------------|--------------|----------------------|----------------|------------------------------------------|--------------------------------------|-------------------------------|------------|-------------------------------------------------------|
| 55.00%                                            | 1            | ICA-FFR              | £2,184.68      | 98.97%                                   | 0.94%                                | 0.08%                         | £17,609.95 | 95%                                                   |
| 65.00%                                            | 1            | ICA-FFR              | £2,177.10      | 98.97%                                   | 0.94%                                | 0.08%                         | £17,617.81 | 100%                                                  |
| 75.00%                                            | 1            | ICA-FFR              | £2,174.90      | 98.97%                                   | 0.94%                                | 0.08%                         | £17,619.73 | 100%                                                  |
| 85.00%                                            | 1            | ICA-FFR              | £2,164.07      | 98.97%                                   | 0.94%                                | 0.08%                         | £17,630.56 | 100%                                                  |
| <b>CET value of £30,000 per correct diagnosis</b> |              |                      |                |                                          |                                      |                               |            |                                                       |
| 15%                                               | 16           | CMR + CTCA + ICA-FFR | £731.84        | 97.72%                                   | 0.39%                                | 0.01%                         | £28,584.48 | 63%                                                   |
| 25.00%                                            | 16           | CMR + CTCA + ICA-FFR | £876.80        | 96.18%                                   | 0.50%                                | 0.02%                         | £27,976.81 | 30%                                                   |
| 35.00%                                            | 1            | ICA-FFR              | £2,166.30      | 98.97%                                   | 0.94%                                | 0.08%                         | £27,525.48 | 49%                                                   |
| 45.00%                                            | 1            | ICA-FFR              | £2,180.69      | 98.97%                                   | 0.94%                                | 0.08%                         | £27,511.04 | 93%                                                   |
| 55.00%                                            | 1            | ICA-FFR              | £2,139.13      | 98.97%                                   | 0.94%                                | 0.08%                         | £27,552.69 | 100%                                                  |
| 65.00%                                            | 1            | ICA-FFR              | £2,174.04      | 98.97%                                   | 0.94%                                | 0.08%                         | £27,517.77 | 100%                                                  |
| 75.00%                                            | 1            | ICA-FFR              | £2,165.04      | 98.97%                                   | 0.94%                                | 0.08%                         | £27,527.26 | 100%                                                  |
| 85.00%                                            | 1            | ICA-FFR              | £2,172.31      | 98.97%                                   | 0.94%                                | 0.08%                         | £27,519.61 | 100%                                                  |
| <b>CET value of £50,000 per correct diagnosis</b> |              |                      |                |                                          |                                      |                               |            |                                                       |
| 15%                                               | 16           | CMR + CTCA + ICA-FFR | £738.32        | 97.70%                                   | 0.39%                                | 0.01%                         | £48,110.28 | 37%                                                   |
| 25.00%                                            | 3            | CMR + ICA-FFR        | £1,083.60      | 96.87%                                   | 0.37%                                | 0.03%                         | £47,351.17 | 34%                                                   |
| 35.00%                                            | 1            | ICA-FFR              | £2,155.01      | 98.97%                                   | 0.94%                                | 0.08%                         | £47,331.81 | 95%                                                   |
| 45.00%                                            | 1            | ICA-FFR              | £2,170.51      | 98.97%                                   | 0.94%                                | 0.08%                         | £47,316.71 | 100%                                                  |
| 55.00%                                            | 1            | ICA-FFR              | £2,177.94      | 98.97%                                   | 0.94%                                | 0.08%                         | £47,308.70 | 100%                                                  |
| 65.00%                                            | 1            | ICA-FFR              | £2,151.75      | 98.97%                                   | 0.94%                                | 0.08%                         | £47,334.97 | 100%                                                  |
| 75.00%                                            | 1            | ICA-FFR              | £2,188.27      | 98.97%                                   | 0.94%                                | 0.08%                         | £47,298.28 | 100%                                                  |

| <b>Pre-test probability</b> | <b>Strategy no.</b> | <b>Description</b> | <b>Expected costs</b> | <b>Expected proportion of correct diagnoses</b> | <b>Expected proportion of complications</b> | <b>Expected proportion of deaths</b> | <b>NMB</b> | <b>Probability of being the most cost-effective strategy</b> |
|-----------------------------|---------------------|--------------------|-----------------------|-------------------------------------------------|---------------------------------------------|--------------------------------------|------------|--------------------------------------------------------------|
| 85.00%                      | 1                   | ICA-FFR            | £2,172.43             | 98.97%                                          | 0.94%                                       | 0.08%                                | £47,313.73 | 100%                                                         |
